# Supplementary material
Source: Springer Nature journal article supplement (https://www.springermedizin.de/resource/supplementary/13024_2012_373_MOESM1_ESM.pdf/9643834)

Supplementary Fig. S1

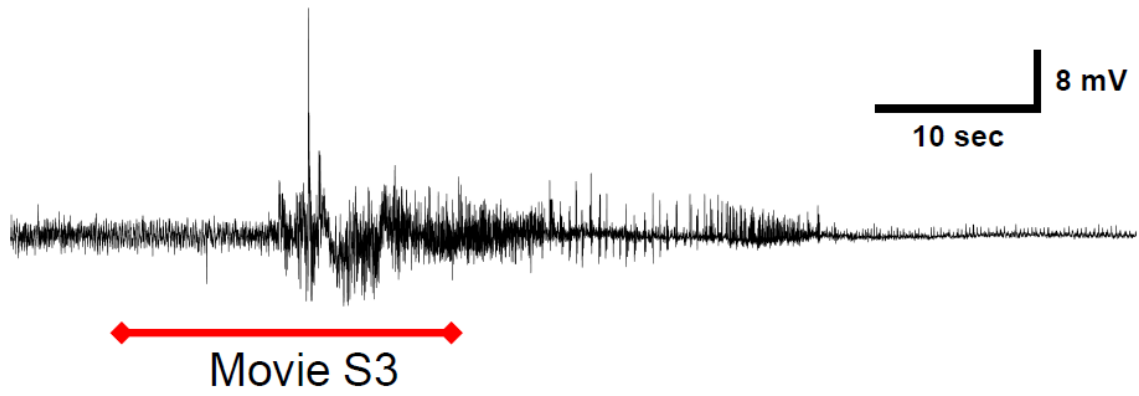

# Supplementary Fig. S2

**A**

|          |    | current density (pA/pF) |                   |                   |                   |
|----------|----|-------------------------|-------------------|-------------------|-------------------|
|          |    | Cell #                  | X11+/+<br>X11L+/+ | X11-/-<br>X11L+/+ | X11+/+<br>X11L-/- |
| Mouse #1 | 1  | 2.75                    | 2.56              | 3.36              | 1.17              |
|          | 2  | 2.28                    | 1.27              | 1.86              | 0.93              |
|          | 3  | 1.11                    | 3.60              | 2.52              | 0.79              |
|          | 4  | 1.09                    | 2.38              | 1.76              | 1.26              |
|          | 5  | 2.10                    | 2.96              | 2.72              | 1.19              |
| Mouse #2 | 6  | 1.17                    | 2.64              | 2.91              | 0.80              |
|          | 7  | 2.92                    | 1.26              | 1.01              | 0.46              |
|          | 8  | 1.88                    | 2.55              | 0.80              | 1.92              |
|          | 9  | 3.12                    | 2.51              | 1.55              | 1.55              |
|          | 10 | 3.38                    |                   |                   |                   |

**B**

| #1 plus #2        |                   |                   |                   |                   |
|-------------------|-------------------|-------------------|-------------------|-------------------|
|                   | X11+/+<br>X11L+/+ | X11-/-<br>X11L+/+ | X11+/+<br>X11L-/- | X11-/-<br>X11L-/- |
| Mean              | 2.18              | 2.41              | 2.05              | 1.12              |
| SD                | 0.86              | 0.75              | 0.88              | 0.44              |
| SEM               | 0.27              | 0.25              | 0.29              | 0.15              |
| Count             | 10                | 9                 | 9                 | 9                 |
| #1                |                   |                   |                   |                   |
| Mean              | 1.87              | 2.55              | 2.45              | 1.07              |
| SD                | 0.74              | 0.86              | 0.66              | 0.20              |
| SEM               | 0.33              | 0.38              | 0.29              | 0.09              |
| Count             | 5                 | 5                 | 5                 | 5                 |
| #2                |                   |                   |                   |                   |
| Mean              | 2.50              | 2.24              | 1.57              | 1.18              |
| SD                | 0.94              | 0.65              | 0.95              | 0.67              |
| SEM               | 0.42              | 0.33              | 0.47              | 0.33              |
| Count             | 5                 | 4                 | 4                 | 4                 |
| t-test (#1 vs #2) |                   |                   |                   |                   |
| P Value           | 0.27              | 0.57              | 0.14              | 0.72              |

**C**

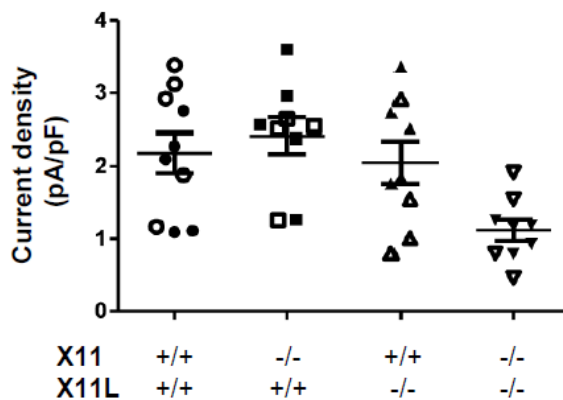

# Supplementary Fig. S3

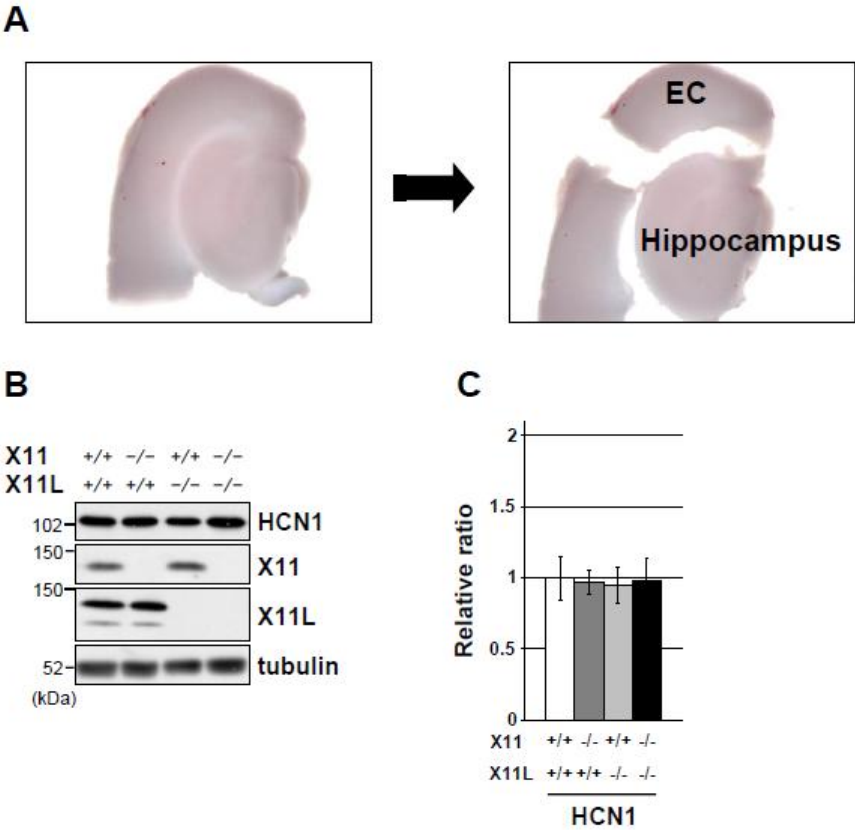

Supplementary Fig. S4

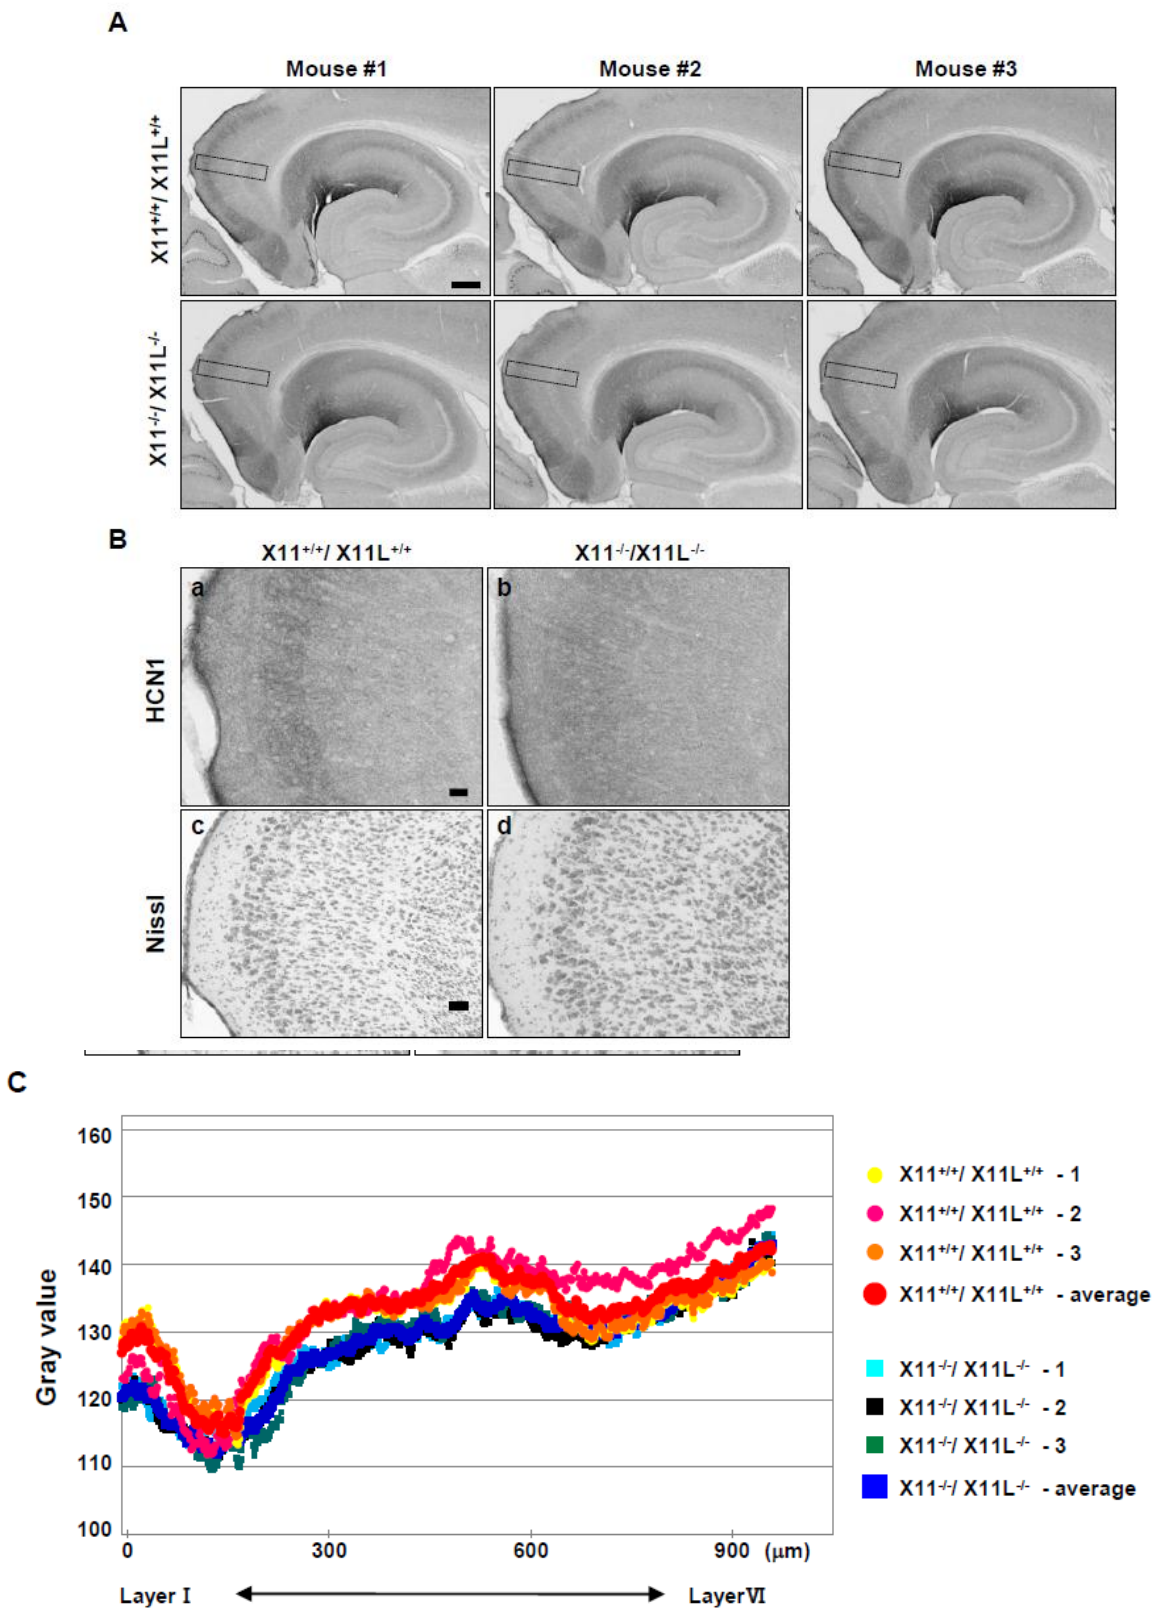

# Supplementary Fig. S5

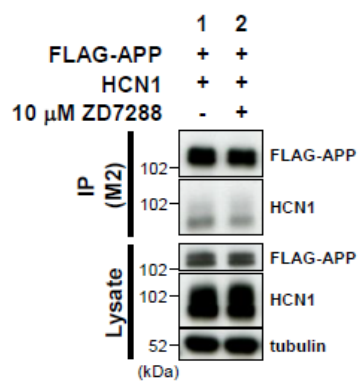

Supplementary Fig. S6

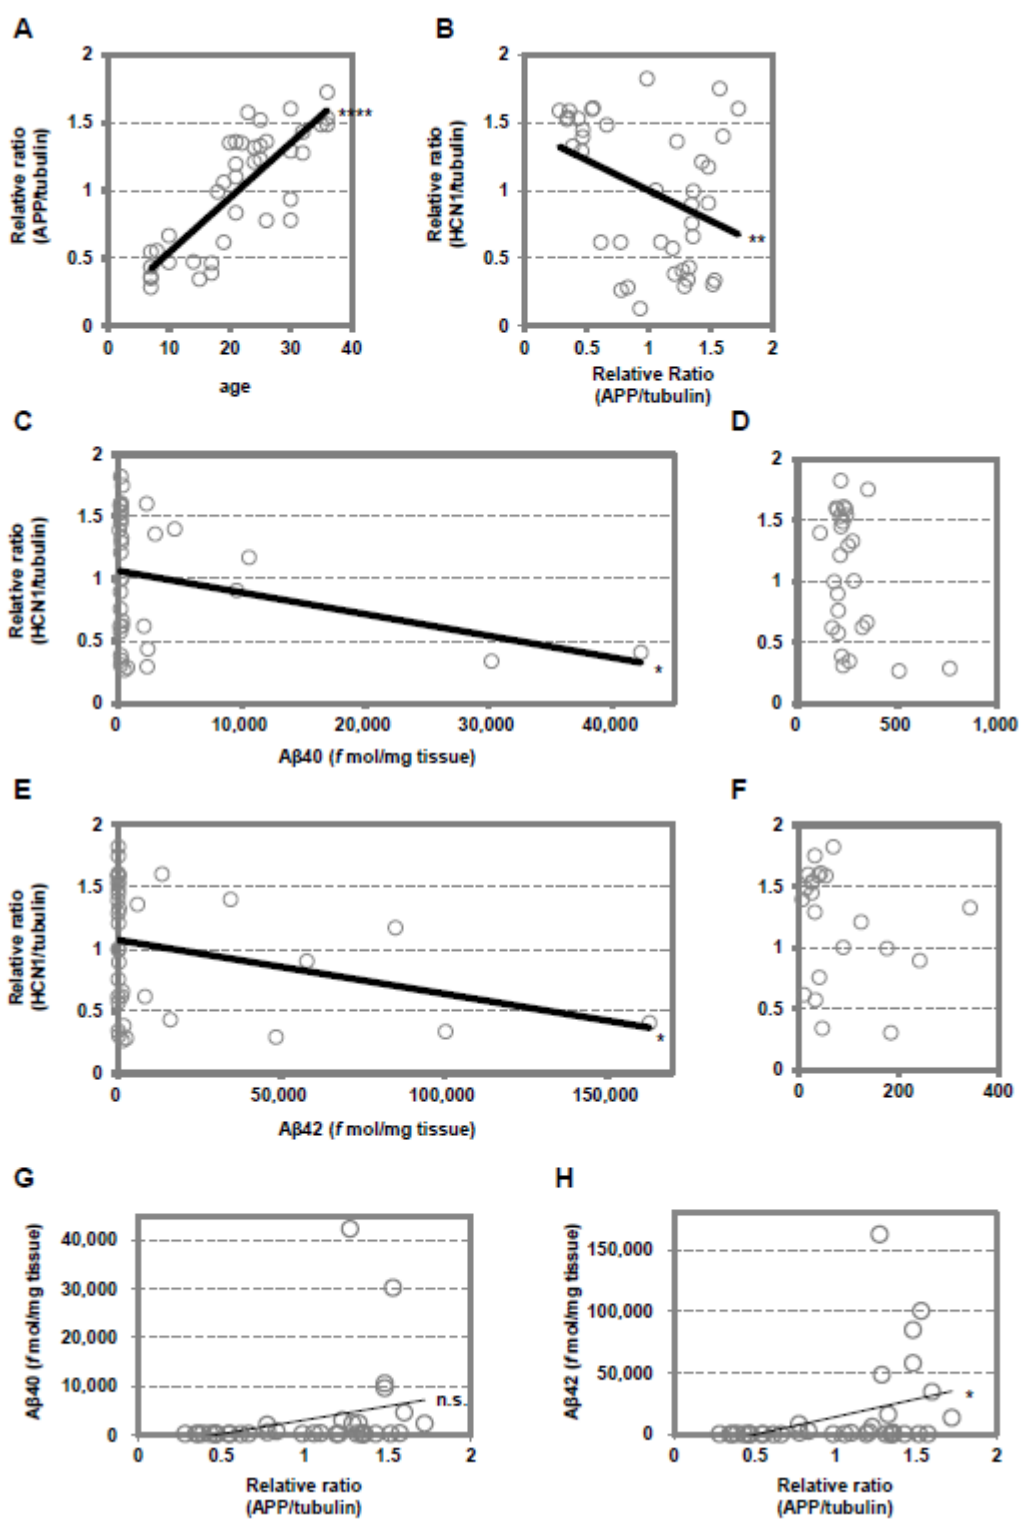

Supplementary Fig. S7

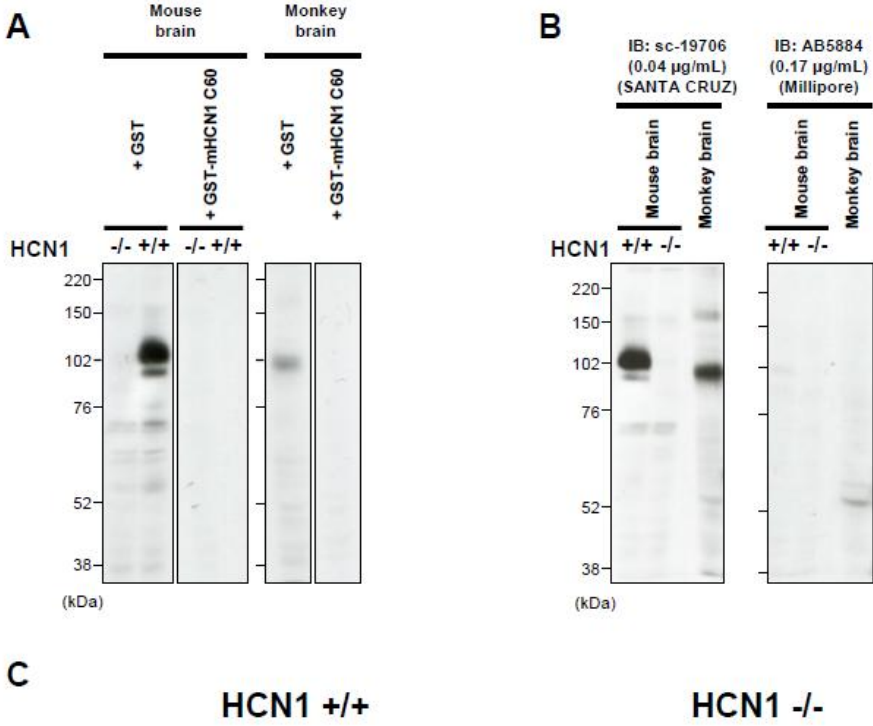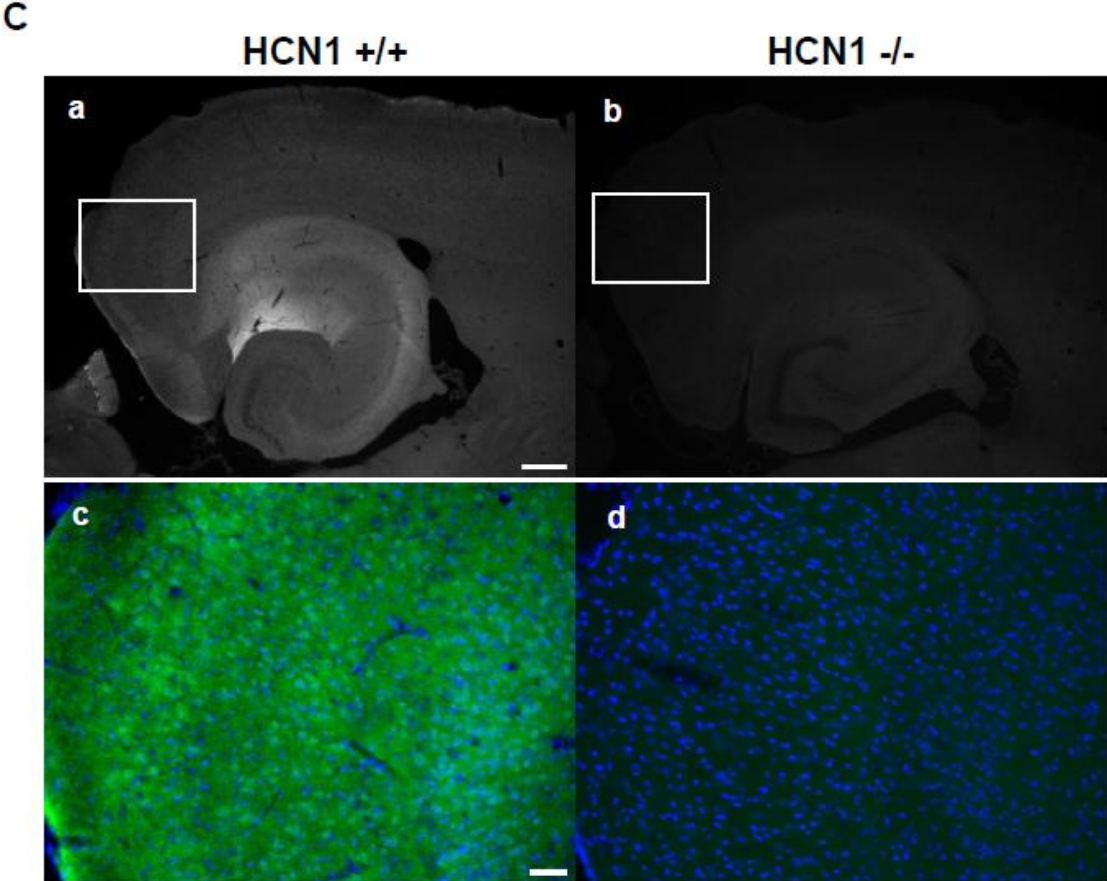

Supplement: MOESM1 [file 9643834]
